# Supplementary material
Source: Elsevier journal article supplement (https://www.sciencedirect.com/science/article/pii/S0212656721002262)
Supplement: mmc1 [file S0212656721002262:mmc1.docx]

**Apéndice suplementario.** Características individuales de los entrevistados (anonimizado)

| **nº entrevista** | **Edad** | **Sexo** | **Universidad** | **año** |
| --- | --- | --- | --- | --- |
| 1 | Grupo focal | | | |
| 2 | Grupo focal | | | |
| 3 | 23 | Mujer | UNLAM | 5to |
| 4 | 23 | Mujer | UCA | IAR |
| 5 | 23 | Mujer | UCA | 6to |
| 6 | 36 | Mujer | UNLAM | 6to |
| 7 | 25 | Mujer | IUHIBA | IAR |
| 8 | 32 | Mujer | UBA | 6to |
| 9 | 23 | Mujer | UNLAM | 5to |
| 10 | 28 | Mujer | UNLAM | 5to |
| 11 | 24 | Mujer | UNLAM | 5to |
| 12 | 32 | Hombre | IUHIBA | IAR |
| 13 | 29 | Hombre | UCA | 6to |
| 14 | 18 | Mujer | IUHIBA | 1ero |
| 15 | 23 | Hombre | UCA | 5to |
| 16 | 24 | Hombre | UBA | 6to |
| 17 | 18 | Mujer | UCA | 1ero |
| 18 | 22 | Mujer | UCA | 5to |
| 19 | 19 | Mujer | IUHIBA | 1ero |
| 20 | 19 | Mujer | UBA | 1ero |
| 21 | 18 | Hombre | IUHIBA | 1ero |
| 22 | 18 | Hombre | IUHIBA | 1ero |
| 23 | 28 | Mujer | UNLAM | 5to |
| 24 | 24 | Mujer | UNLAM | 5to |
| 25 | 28 | Hombre | UBA | 6to |
| 26 | 32 | Mujer | IUHIBA | IAR |
| 27 | 21 | Mujer | UBA | 1ero |
| 28 | 18 | Hombre | IUHIBA | 1ero |
| 29 | 25 | Hombre | UBA | 5to |
| 30 | 20 | Mujer | UBA | 1ero |
| 31 | 26 | Mujer | UBA | 6to |
| 32 | 23 | Mujer | UCA | 5to |
| 33 | 22 | Mujer | UCA | 1ero |
| 34 | 21 | Hombre | UBA | 1ero |
| 35 | Grupo focal | | | |

UBA: Universidad de Buenos Aires

UNLAM: Universidad Nacional de La Matanza

IUHIBA: Instituto Universitario Hospital Italiano de Buenos Aires

UCA: Universidad Católica Argentina
